# Supplementary material for: Molecular characterization of orf virus from sheep and goats in Ethiopia, 2008–2013
Source: PubMed Central journal article supplement (PMC4770539; doi:10.1186/s12985-016-0489-3), 2016-02-29
Supplement: 12985_2016_489_MOESM1_ESM.pdf [file 12985_2016_489_MOESM1_ESM.pdf]

**Questionnaire format for orf disease outbreaks investigations**

1. Background information:

Today's date \_\_\_\_\_

Owner's name \_\_\_\_\_

Region/Zone/District \_\_\_\_\_

Date of first outbreak \_\_\_\_\_

Type of farming Free range  Penned

2. Do you have only sheep  only goats  or both

3. Number of sheep and goats per household \_\_\_\_\_

4. Occurrence of pox-like infections:

4.1. Occurrence

First time Yes  No

Commonly occurred Yes  No

4.2. Season of occurrence

Dry season Yes  No

Rainy season Yes  No

5. Animals affected/sick (sheep/goat/both):

| Species | sex    | Age group |           |          | Total |
|---------|--------|-----------|-----------|----------|-------|
|         |        | <1 years  | 1-3 years | >3 years |       |
|         | Male   |           |           |          |       |
|         | Female |           |           |          |       |

6. Major clinical signs observed: \_\_\_\_\_
